## Author Index

---

- Ackermann, R. 420  
Adachi, K. 218, 341  
Agerholm, M. 3  
Allert, M. L. 100  
Althaus, P. 362  
Aso, Y. 386
- Beshly-Ogly, D. A. 321  
Bissett, P. 465  
Boettger, F. 77  
Borrelli, M. 357  
Brunetti, A. 326
- Campos Freire, J. G. 357  
Chiari, R. 455  
Clow, W. M. 9  
Constantinou, C. E. 369  
Coolsaet, B. L. R. A. 16  
Cosciani Cunico, S. 397
- Dell'Adami, G. 326  
Derluyn, J. 92  
Duyt, W. A. van 16
- Erdman, S. 173
- Fingerhut, B. 255  
Fischer, D. 100  
Fjeldborg, O. C. 433  
Flack, F. C. 103  
Fladerer, H. 350  
Frohmüller, H. 420
- Gassner, S. 173  
Glen, E. S. 27  
Godec, C. 99  
Gratzlová, J. 313  
Griffiths, D. J. 28
- Haas, P. 181  
Harzmann, R. 455
- Haubensak, K. 29  
Hauri, D. 273  
Hidai, H. 446  
Hodgkinson, A. 465  
Horpácsy, G. 362  
Hubmer, G. 350
- Ianhez, L. E. 357  
Ise, K. 341  
Ishibe, T. 437
- James, E. D. 103  
James, W. 27  
Janko, M. 99  
Jelasic, F. 100  
Jiménez, F. 305
- Katona, F. 192  
Kaufman, J. J. 145  
Kelâmi, A. 402  
Kiesswetter, H. 63  
Kim, C.-H. 433  
Kimura, Y. 218, 341  
Kinoshita, K. 386  
Kisaki, N. 218, 341  
Kjelle-Schweigler, M. 237  
Komatz, Y. 381
- Leisinger, H. J. 273  
Levy, M. J. 173  
Loeweneck, H. 332  
Lopatkine, N. A. 321
- Madersbacher, H. 75  
Manavella, J. N. 305  
Mastricht, R. van 16  
Matouschek, E. 266  
Matsuda, S. 211  
May, G. 362  
Melchior, H. 54  
Michaelis, W. E. 266

- Miyata, K. 218  
 Mobilio, G. 397  
 Möhring, K. 414  
 Moormann, J. G. 129  
 Mori, K. 437  
 Mosconi, C. E. V. 357  
  
 Nihira, H. 437  
  
 Olesen, K. P. 46  
 Ott, R. 72  
  
 Palm, L. 34  
 Palmtag, H. 77  
 Panis-Hoffmann, C. 414  
 Pavlovič, M. 313  
 Petritsch, P. H. 145  
 Pfitzenmaier, N. W. 237, 414  
 Pick, A. I. 162  
 Puigvert, A. 282, 305  
 Pust, R. 245, 402  
  
 Rakovec, S. 99  
 Reisewitz, H. 109, 117  
 Revúsová, V. 313  
 Řezníček, J. 313  
 Riedel, B. 245  
 Rodomane, V. E. 321  
 Röhl, L. 77  
 Rossier, A. B. 72  
 Rost, A. 245, 402  
 Rothaar, J. 29  
 Rowan, D. 27  
 Ruedas, G. 109, 117  
  
 Sabbaga, E. 357  
 Sacks, S. A. 145  
 Schindler, E. 29  
  
 Schmidt, G. P. 332  
 Schmucki, O. 273  
 Schober, W. 63  
 Schönfeld, J. 162  
 Schreibman, S. 162  
 Schreiter, F. 33  
 Scott, F. B. 75  
 Shabad, A. L. 297, 321  
 Shirai, M. 211  
 Shishito, S. 211  
 Stahl, J. 77  
 Stockamp, K. 33  
 Strobelt, V. 362  
 Sulmoni, A. 273  
  
 Taenzer, V. 402  
 Takasaki, E. 228  
 Terbizan, A. 181  
 Torrens, M. J. 85  
 Trontelj, J. V. 99  
 Tsuchida, S. 204  
 Tye, J. 465  
  
 Usui, T. 437  
  
 Veenema, R. J. 255  
 Verduyn, H. 92  
 Vereecken, R. L. 92  
 Vidne, B. 173  
  
 Weber, P. 402  
 Wurster, K. 237  
  
 Yasuishi, K. 437  
 Yoshida, O. 381  
  
 Zinsmeyer, J. 362  
 Zvara, V. 313  
 Zwart, A. van der 16
